1 **A bootstrap approach is a superior statistical method for the comparison of cell-to-cell movement**  
2 **data**

3 Matthew G. Johnston<sup>1</sup> and Christine Faulkner

4 Department of Crop Genetics, John Innes Centre, Norwich, UK

5 <sup>1</sup>Corresponding author: matthew.johnston@jic.ac.uk, +44 (0)1603 450000

6 Total words: 1176

7 Total figures: 1

8 **Keywords**

9 Plasmodesmata, bootstrap, Mann-Wilcoxon-Whitney, cell-to-cell movement, statistics

10 **Summary**

11 Plasmodesmata are an increasing focus of plant research, and plant physiologists frequently aim to  
12 understand the dynamics of intercellular movement and plasmodesmal function. For this,  
13 experiments that measure the spread of GFP between cells are commonly performed to indicate  
14 whether plasmodesmata are more open or closed in different conditions or in different genotypes.

15 We propose cell-to-cell movement data sets are better analysed by a bootstrap method that tests  
16 the null hypothesis that means (or medians) are the same between two conditions, instead of the  
17 commonly used Mann-Whitney-Wilcoxon test. We found that that with hypothetical distributions  
18 similar to cell-to-cell movement data, the Mann-Whitney-Wilcoxon produces a false positive rate of  
19 17% while the bootstrap method maintains a false positive at the set rate of 5% under the same  
20 circumstances. Here we present this finding, as well as our rationale, an explanation of the  
21 bootstrap method and an R script for easy use. We have further demonstrated its use on published  
22 datasets from independent laboratories.

23 **Main Text**

24 Symplastic cell-to-cell connectivity is dynamically regulated in plants as a component of  
25 developmental and environmental responses (Perbal *et al.*, 1996; Wada *et al.*, 2002; Faulkner *et al.*,  
26 2013). Connectivity is established between cells by plasmodesmata, which function as a key  
27 parameter to define the dynamics of cell-to-cell connectivity. It is critical to assay the degree of  
28 movement of different molecules between cells to understand the range and dynamics of cell-to-cell  
29 communication as well as to assay plasmodesmal function under different conditions or in different  
30 genotypes. Accurate experimental analysis is critical to understanding this important component of  
31 plant physiology.

32 There are two routinely used methods, with a cellular resolution, to assay the spread of GREEN  
33 FLUORESCENT PROTEIN (GFP) from one cell into neighbouring cells: microprojectile bombardment,  
34 and low OD<sub>600</sub> *Agrobacterium tumefaciens* infiltration (Oparka *et al.*, 1999; Burch-Smith & Zambryski,  
35 2010). These assays allow the experimenter to count the number of cells ('cell count'), or the  
36 number of concentric rings of cells ('cell layers'), to which GFP has spread from a single cell (Fig. **1a**).  
37 This serves as a measure of symplastic connectivity – the further the GFP has spread, the greater the  
38 degree of connection (or of plasmodesmata permeability) between cells. Neither cell nor layer  
39 counts are parametrically distributed (Fig. **1b – d**, upper), so most studies use the non-parametric  
40 Mann–Whitney–Wilcoxon (MWW) test to compare conditions to identify factors that regulate the  
41 connection and communication between cells.

42 Most experiments aim to assess whether connectivity is greater or less under different conditions, or  
43 whether plasmodesmata are more open or closed, which involves analysis of changes in the median  
44 or mean. The MWW tests the null hypothesis that two data distributions are the same (Mann &  
45 Whitney, 1947), not whether the two distributions have the same median. Therefore, it is possible to  
46 find a significant difference in an MWW test with distributions that have the same median, but  
47 different variances (Hart, 2001). When data from cell count assays are presented in histogram form,  
48 it is clear that the shape of the distributions differs between experimentally compared conditions or  
49 genotypes (Fig. **1b, c**) (Guseman *et al.*, 2010; Diao *et al.*, 2018; Cheval *et al.*, 2020). Thus, if an MWW  
50 test is used on cell count data, the difference in distribution shapes between conditions may lead to  
51 the erroneous conclusion that there is a significant difference in the amount of spread of GFP.

52 Therefore, a different statistical method is required to properly interpret differences in GFP spread.  
53 For this, we propose a bootstrap method (Efron, 1979). Unlike the MWW test, bootstrapping works  
54 with data that is both non-parametric and heteroskedastic (differing variance between conditions).

55 The goal of the analysis is to estimate the probability that the observed difference in medians ( $\hat{\theta}$ )  
56 came about by chance (a *p* value). Frequentist statistics does this by comparing  $\hat{\theta}$  to a null  
57 distribution. In this case, the null distribution describes the probability of observing a difference in  
58 medians, when there is no true difference in the underlying data. Usually, a known distribution is  
59 used (e.g. t-distribution or F-distribution) but in this case it is unknown because the data do not  
60 follow parametric distributions (Fig. **1b, c**).

61 Bootstrapping techniques can be used to generate a null distribution *de novo* from the observed  
62 data already collected, as long as the samples are independent. This removes the requirement of  
63 using a known distribution. To do this, the observed data are sampled with replacement to generate  
64 a resample. This mimics what the experimenter has done originally when observing the true

65 population. The relationship between multiple resamples and the observed data can be used to  
66 reveal how the observed data relate to the true population, and so estimate a  $p$  value for the  
67 observation.

68 An example R function is provided to perform this analysis (*medianBootstrap.R*,  
69 <https://github.com/faulknerfalcons/Johnston-2020-Bootstrap>), which requires two arguments, i.e.  
70 two vectors of numbers: control and treatment. The function generates a null distribution to  
71 compare against by resampling each vector  $N$  times (by default 5000) and, for each resample,  
72 generating a resampled test statistic ( $\widehat{\theta}^*$ ). These  $N$  resampled test statistics are made into a null  
73 distribution by  $|\widehat{\theta}^*_n - \widehat{\theta}|$  (Fig. **1b – c**, lower) as suggested by Hall and Wilson (1991).

74 As this is a random sampling technique, an exact  $p$  value cannot be calculated but an estimate is  
75 produced: a Monte Carlo  $\hat{p}$  value (Eqn. 1). To do so,  $\widehat{\theta}$  is compared to the null distribution to find the  
76 chance of observing a value at least as extreme (line on Fig. **1b – c**, lower). A +1 is added to the  
77 numerator and denominator in Eqn. 1 as suggested by Davison and Hinkley (1997): conceptually, this  
78 can be considered as including the observed sample among the bootstrap resamples.

$$\hat{p} = \frac{\sum_{n=1}^N I(|\widehat{\theta}^*_n - \widehat{\theta}| \geq \widehat{\theta}) + 1}{N + 1} \quad \text{Eqn. 1}$$

79 where  $I(\cdot)$  is the indicator function.

80 As  $\hat{p}$  is an estimate of  $p$ , a 95% confidence interval should be constructed, where  $p$  will fall within  
81 this range 95% of the time (Wilson, 1927).

82 This method is not confounded by differences in variance or shape as with the MWW test. To  
83 illustrate this, we compared the Type I error rate (false positives) between the MWW and  
84 *medianBootstrap* tests, when testing if there is a difference in medians between two populations for  
85 which there was no true difference in medians, i.e.  $\theta = 0$ . In this scenario, an error rate of 5% is  
86 expected at  $\alpha = 0.05$ . Samples ( $n = 100$ ) for each population were drawn from normal  
87 distributions with the same variance ( $X, Y \sim N(0,1)$ ) simulated in R 4.0.0 (R Core Team, 2020). Both  
88 the MWW and *medianBootstrap* methods gave a difference in medians about 5% of the time, as  
89 expected (4.5% (95% CI [3.4, 6.0]) and 4.9% (95% CI [3.7, 6.4]), respectively). When variances  
90 differed between populations ( $X \sim N(0,1), Y \sim N(0, 5^2)$ ), the MWW test had a false positive rate  
91 significantly higher than the set 5% of 7.5% (95% CI [6.0, 9.3]). Conversely, the false positive rate of  
92 the *medianBootstrap* method was correctly controlled at 4.7% (95% CI [3.6, 6.2]).

93 Alternatively, when two samples are drawn from populations with equal variance and median, but  
94 differing shape ( $X \sim N(1 - \frac{1}{\sqrt{2}}, \frac{3}{80}), Y \sim \text{Beta}(1,3)$ ), a *medianBootstrap* method finds a significant

95 difference in 5.1% of the trials (95% CI [3.9, 6.6]), as expected. Whereas, an MWW test inflates the  
96 Type I error rate to 17% (95% CI [15, 19]). Therefore, as cell count data exhibit unequal variances and  
97 differing distribution shapes between conditions and/or genotypes, we propose that bootstrap  
98 methods are a more appropriate analysis to identify differences in the spread of GFP. It is worth  
99 noting that any test statistic,  $\theta$ , can be computed in a bootstrapped manner, provided the test is  
100 invariant to scaling. This means bootstrap testing can be extended to cell layer data, where means  
101 should be compared, as there is no difference in medians (Fig. 1d). An example of this extension is  
102 given in *medianBootstrap.html*.

103 We acknowledge alternative advanced statistical techniques, such as linear mixed effects models, for  
104 the analysis of these data. However, they require more assumptions and are less user-friendly. We  
105 consider this bootstrap method a good, easy-to-use, superior alternative to MWW analysis of cell-to-  
106 cell movement data.

### 107 Acknowledgments

108 We thank Joanna Jennings (Department of Crop Genetics, John Innes Centre) for providing the  
109 confocal micrograph in Fig. 1a and Dr Joshua Hodgson (Department of Medicine, University of  
110 Cambridge) and Dr Matthew Castle (Department of Genetics, University of Cambridge) for  
111 constructive comments on the manuscript. The data in Fig. 1 comes from (b) Figure S2 of Cheval *et al.*  
112 (2020), (c) Figure 2d Diao *et al.* (2018), (d) Figure 2c Diao *et al.* (2018) under use of the CC BY 4.0  
113 licence. MGJ is funded by a John Innes Foundation Studentship. Research in the Faulkner lab is  
114 supported by the Biotechnology and Biological Research Council Grant (BB/L000466/1,  
115 BBS/E/J/000PR9796) and the European Research Council (725459, “INTERCELLAR”).

### 116 Author Contributions

117 MGJ and CF designed, discussed and wrote up the research. MGJ performed the analysis.

### 118 References

- 119 **Burch-Smith TM, Zambryski PC. 2010.** Loss of increased size exclusion limit (ise)1 or ise2 increases  
120 the formation of secondary plasmodesmata. *Current Biology* **20**: 989–993.
- 121 **Cheval C, Samwald S, Johnston MG, de Keijzer J, Breakspear A, Liu X, Bellandi A, Kadota Y, Zipfel C,  
122 Faulkner C. 2020.** Chitin perception in plasmodesmata characterizes submembrane immune-  
123 signaling specificity in plants. *Proceedings of the National Academy of Sciences* **117**: 9621–9629.
- 124 **Davison AC, Hinkley D V. 1997.** *Bootstrap Methods and their Application*. Cambridge University  
125 Press.
- 126 **Diao M, Ren S, Wang Q, Qian L, Shen J, Liu Y, Huang S. 2018.** Arabidopsis formin 2 regulates cell-to-  
127 cell trafficking by capping and stabilizing actin filaments at plasmodesmata. *eLife* **7**: e36316.
- 128 **Efron B. 1979.** Bootstrap Methods: Another Look at the Jackknife. *The Annals of Statistics* **7**: 1–26.

- 129 **Faulkner C, Petutschnig E, Benitez-Alfonso Y, Beck M, Robatzek S, Lipka V, Maule AJ. 2013.** LYM2-  
130 dependent chitin perception limits molecular flux via plasmodesmata. *Proceedings of the National*  
131 *Academy of Sciences* **110**: 9166–9170.
- 132 **Guseman JM, Lee JS, Bogenschutz NL, Peterson KM, Virata RE, Xie B, Kanaoka MM, Hong Z, Torii**  
133 **KU. 2010.** Dysregulation of cell-to-cell connectivity and stomatal patterning by loss-of-function  
134 mutation in Arabidopsis CHORUS (GLUCAN SYNTHASE-LIKE 8). *Development* **137**: 1731–1741.
- 135 **Hall P, Wilson SR. 1991.** Two Guidelines for Bootstrap Hypothesis Testing. *Biometrics* **47**: 757–762.
- 136 **Hart A. 2001.** Mann-Whitney test is not just a test of medians: Differences in spread can be  
137 important. *British Medical Journal* **323**: 391–393.
- 138 **Mann HB, Whitney DR. 1947.** On a Test of Whether one of Two Random Variables is Stochastically  
139 Larger than the Other. *The Annals of Mathematical Statistics* **18**: 50–60.
- 140 **Oparka KJ, Roberts AG, Boevink P, Cruz SS, Roberts I, Pradel KS, Imlau A, Kotlizky G, Sauer N, Epel**  
141 **B. 1999.** Simple, but not branched, plasmodesmata allow the nonspecific trafficking of proteins in  
142 developing tobacco leaves. *Cell* **97**: 743–754.
- 143 **Perbal MC, Haughn G, Saedler H, Schwarz-Sommer Z. 1996.** Non-cell-autonomous function of the  
144 Antirrhinum floral homeotic proteins DEFICIENS and GLOBOSA is exerted by their polar cell-to-cell  
145 trafficking. *Development* **122**: 3433–41.
- 146 **R Core Team. 2020.** R: A Language and Environment for Statistical Computing.
- 147 **Wada T, Kurata T, Tominaga R, Koshino-Kimura Y, Tachibana T, Goto K, Marks MD, Shimura Y,**  
148 **Okada K. 2002.** Role of a positive regulator of root hair development, CAPRICE, in Arabidopsis root  
149 epidermal cell differentiation. *Development* **129**: 5409–19.
- 150 **Wilson EB. 1927.** Probable Inference, the Law of Succession, and Statistical Inference. *Journal of the*  
151 *American Statistical Association* **22**: 209–212.
- 152 **Figure 1 Bootstrap statistics on GFP movement data.**

153 **(a)** An example image of GFP moving from a single transformation site. The degree of movement can  
154 either be counted as the number of fluorescent cells (denoted with stars, 17 cells) or the number of  
155 cell layers with GFP (blue overlays, 3 layers). Scale bar = 100  $\mu\text{m}$ . **(b – d) Top:** Histogram of cell  
156 counts or layers, with the median and mean marked. **Bottom:** Bootstrap null distributions ( $|\hat{\theta}^* - \hat{\theta}|$ )  
157 for the differences in **(b, c)** median or **(d)** mean, with estimated  $\hat{p}$  value and 95% confidence intervals  
158 (CI). The observed difference ( $\hat{\theta}$ ) is marked by a red line. Data for **(b)** from Cheval *et al.* (2020) and  
159 data for **(c, d)** from Diao *et al.* (2018) both under the CC BY 4.0 licence.

a)

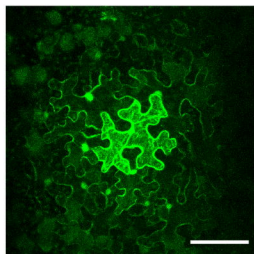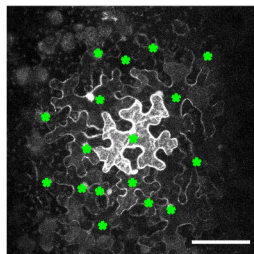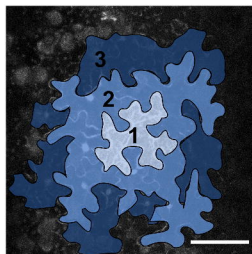

- Median
- Mean
- $\theta$  Test statistic
- $\hat{\theta}$  Sampled test statistic
- $\hat{\theta}^*$  Resampled test statistic
- $\Delta_\mu$  Difference in means
- $\Delta_{\text{median}}$  Difference in medians

b)

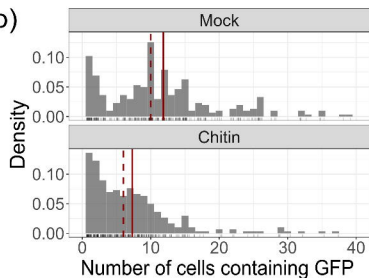

c)

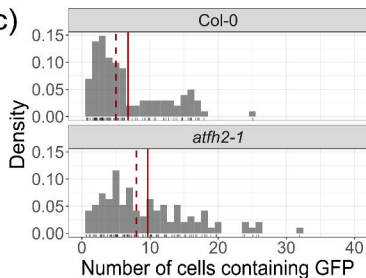

d)

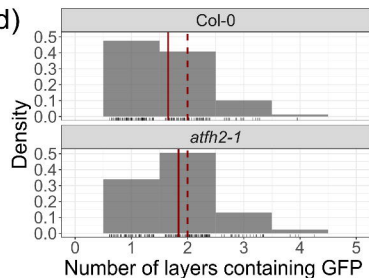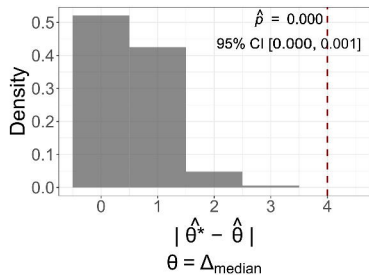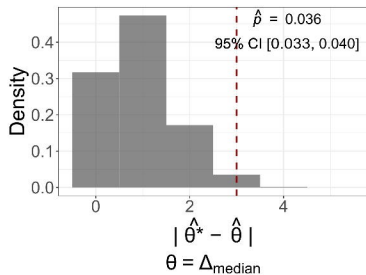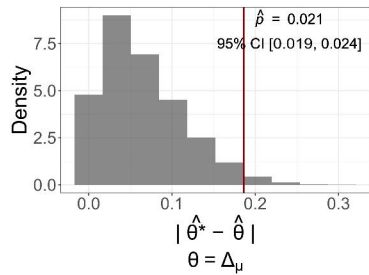

Source: http://biorxiv.org/content/10.1101/2020.09.11.292672v1.full.pdf
